# Supplementary material
Source: PubMed Central journal article supplement (PMC10225355)

A

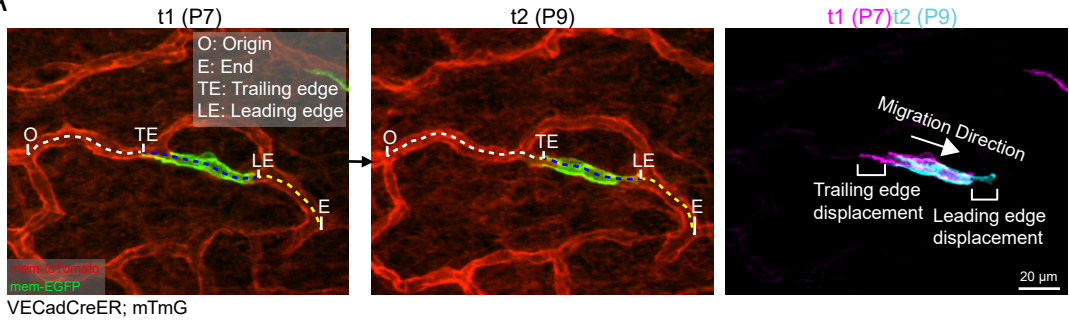

Trailing edge (TE) displacement = O:TE (t2) - O:TE (t1)  
 Leading edge (LE) displacement = O:LE (t2) - O:LE (t1)  
 Average Displacement =  $\left( \frac{\text{TE displacement} + \text{LE displacement}}{2} \right)$   
 Expansion factor =  $\frac{\text{O:E (t2)}}{\text{O:E (t1)}}$   
 Average Normalized Displacement =  $\frac{\text{Average Displacement}}{\text{Expansion Factor}}$

B

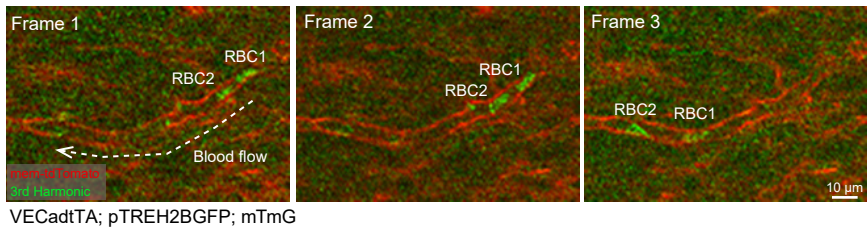

C

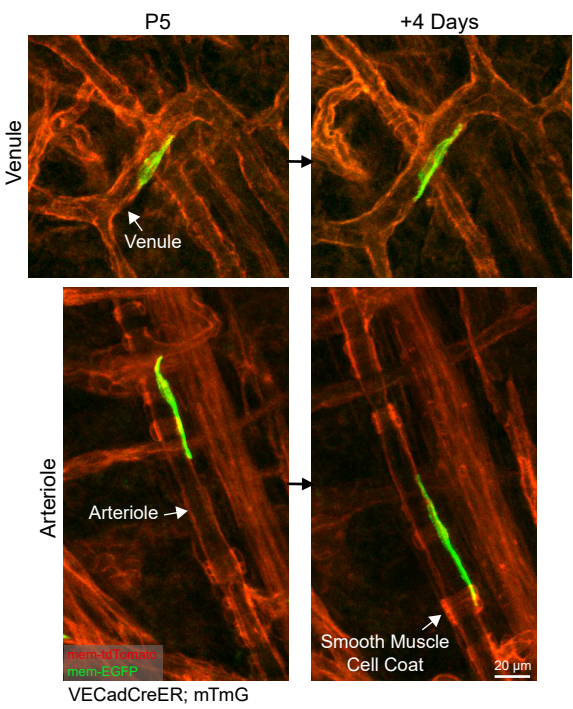

C'

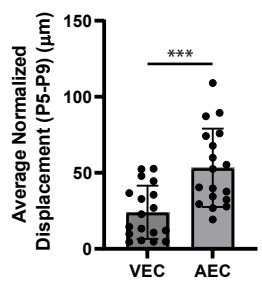

Supplement: NIHMS1893073-supplement-3.pdf [file NIHMS1893073-supplement-3.pdf]
