# Supplementary material
Source: PubMed Central journal article supplement (PMC10225355)

A

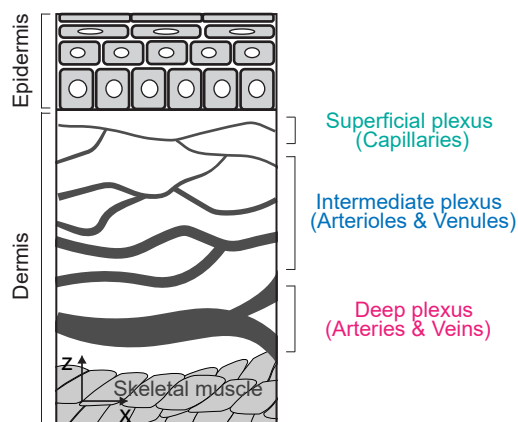

B

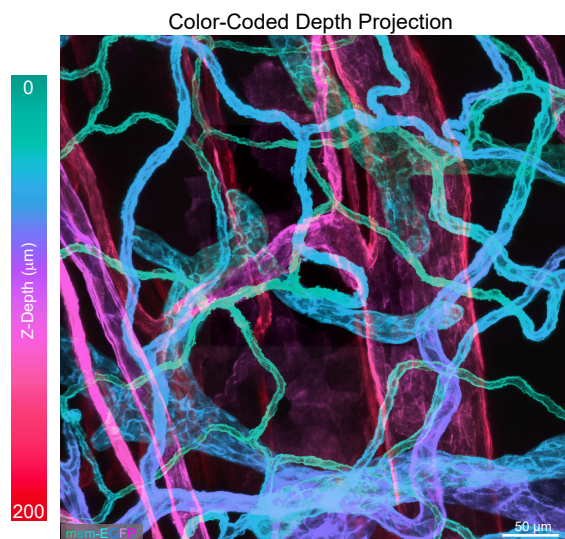

C

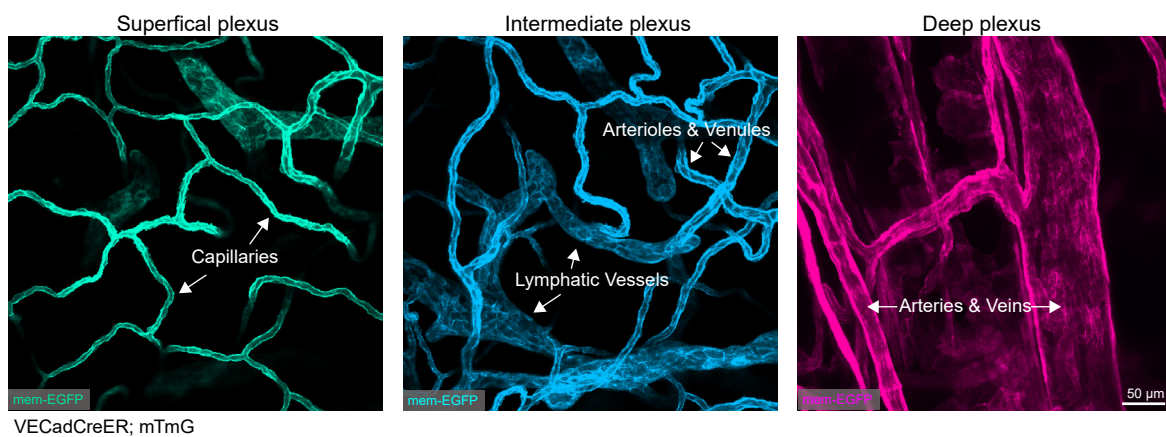

D

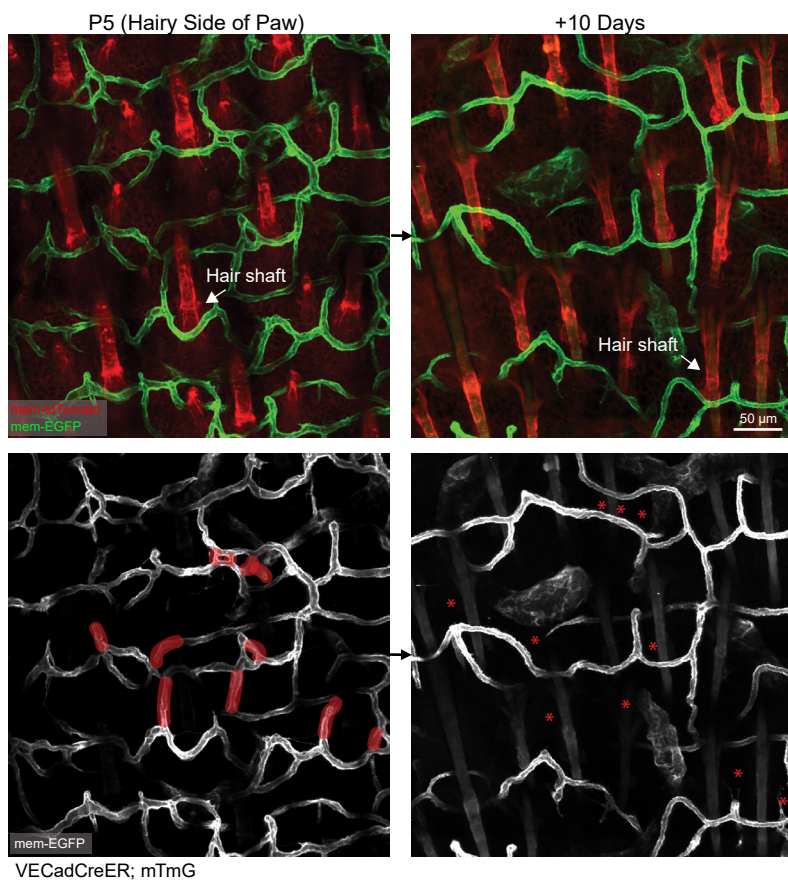

E

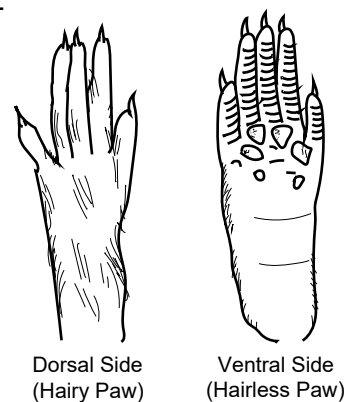

D'

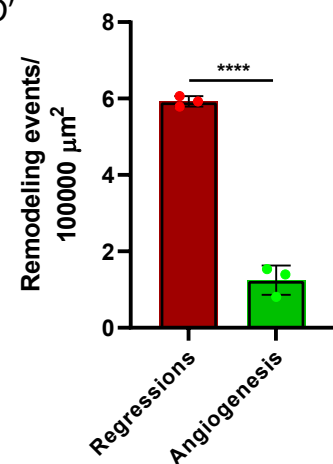

Supplement: NIHMS1893073-supplement-1.pdf [file NIHMS1893073-supplement-1.pdf]

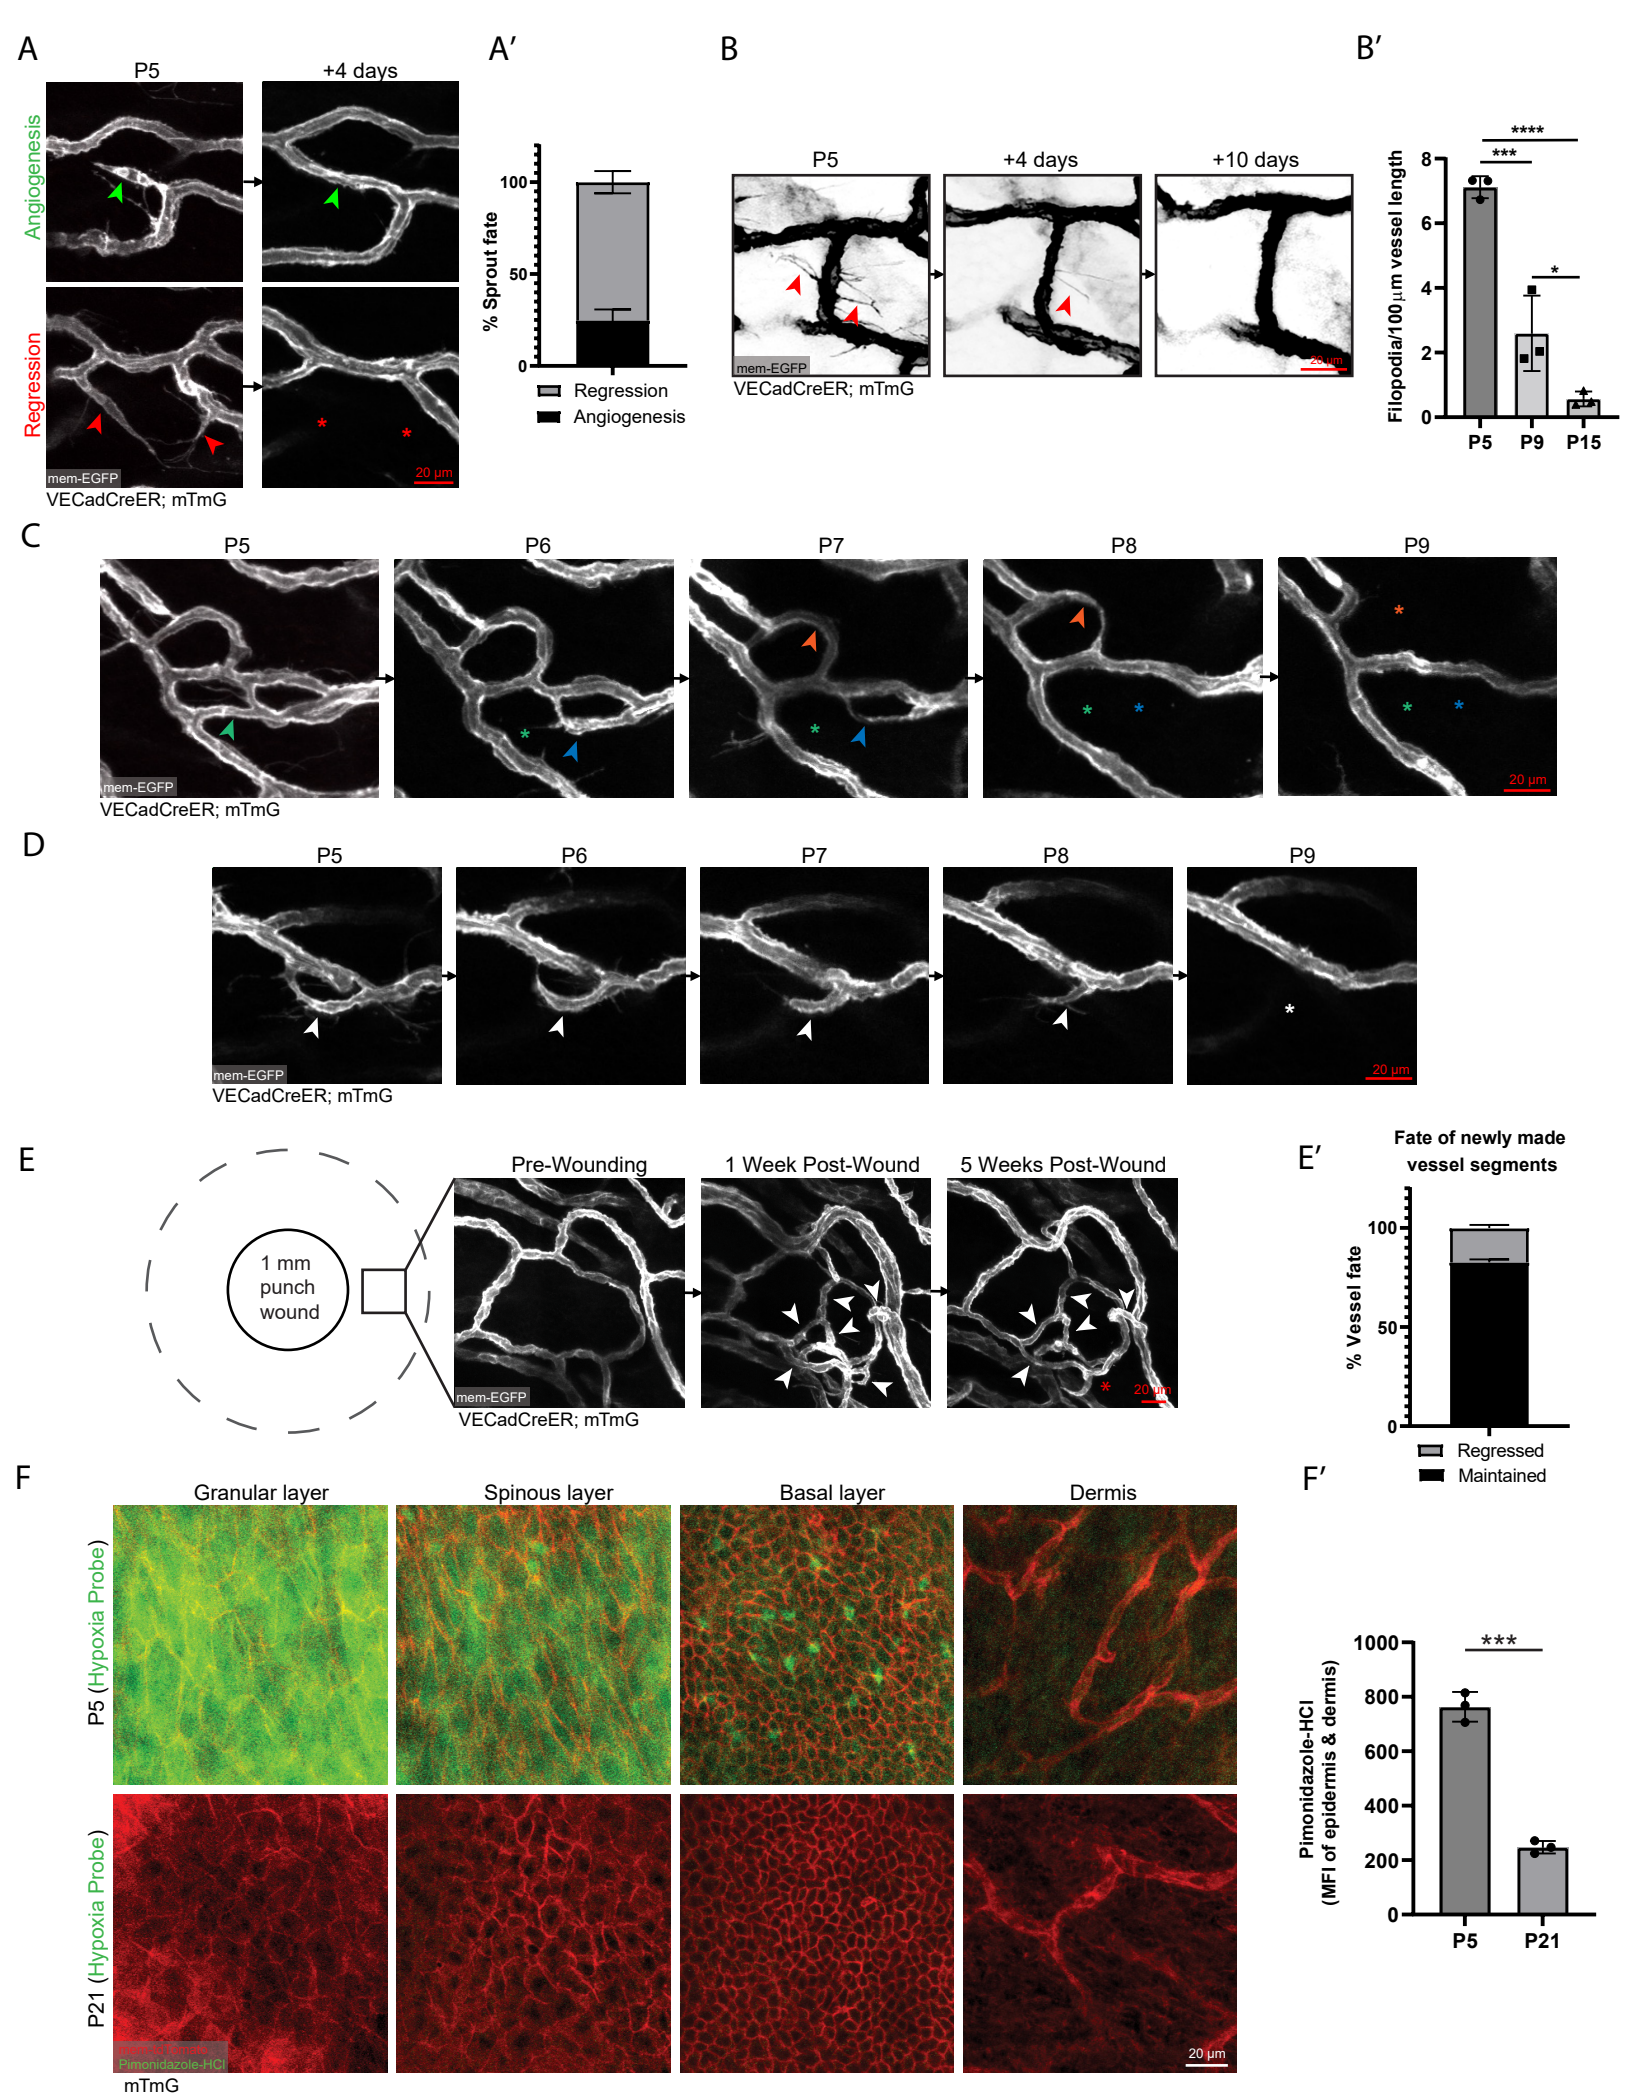

Supplement: NIHMS1893073-supplement-2.pdf [file NIHMS1893073-supplement-2.pdf]

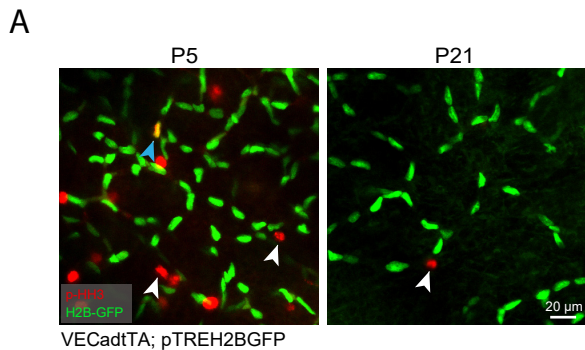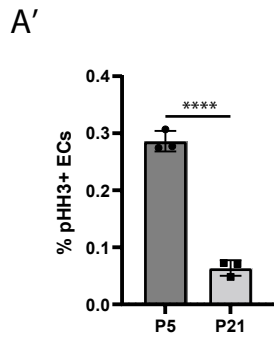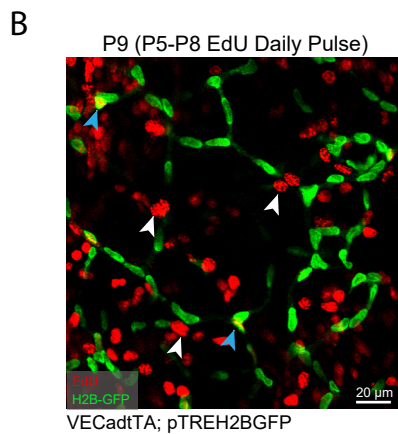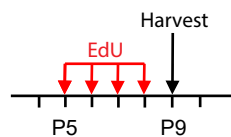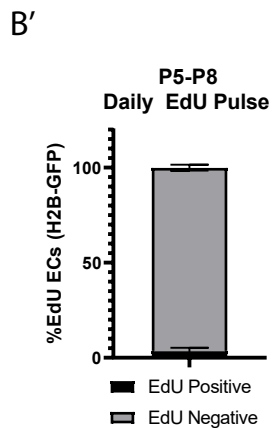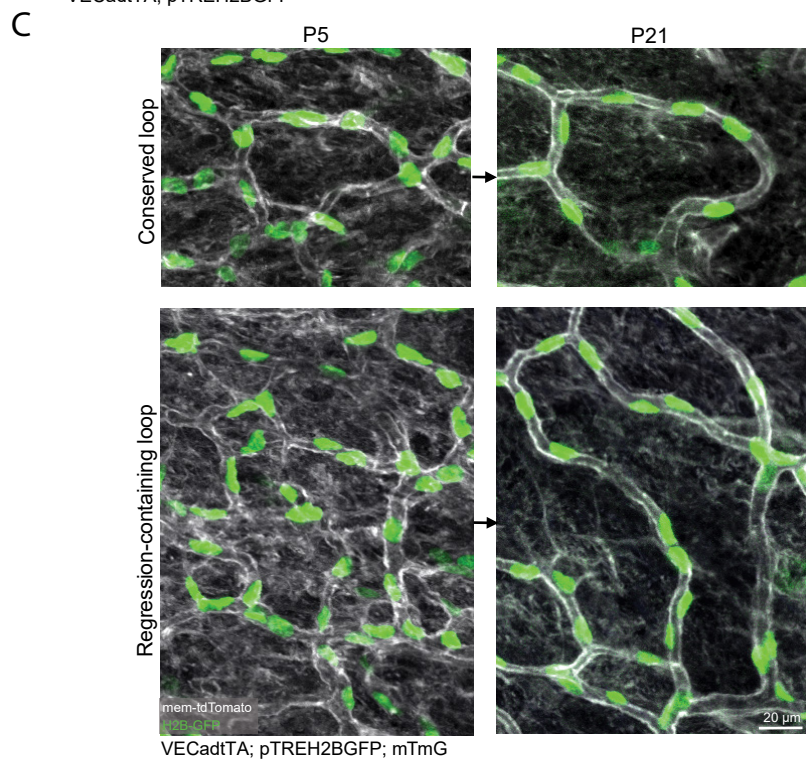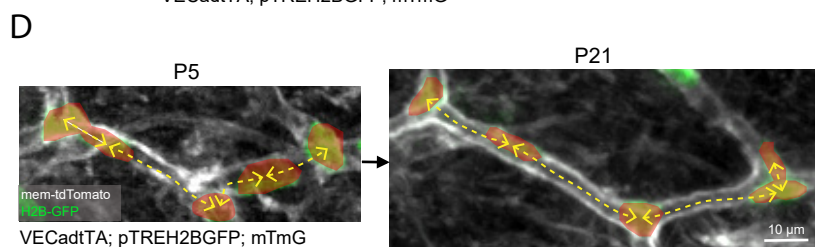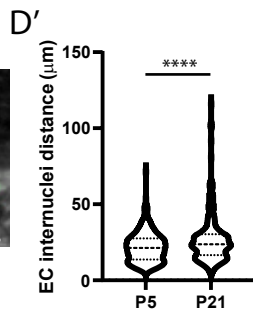

Supplement: NIHMS1893073-supplement-4.pdf [file NIHMS1893073-supplement-4.pdf]

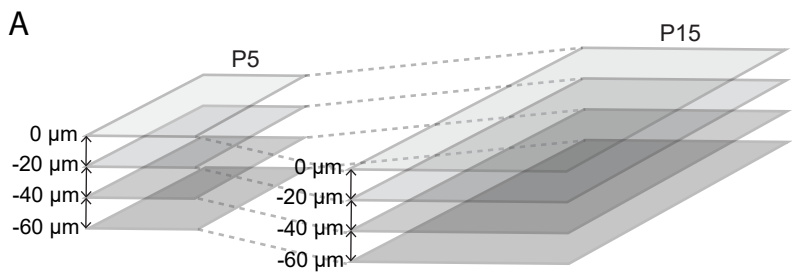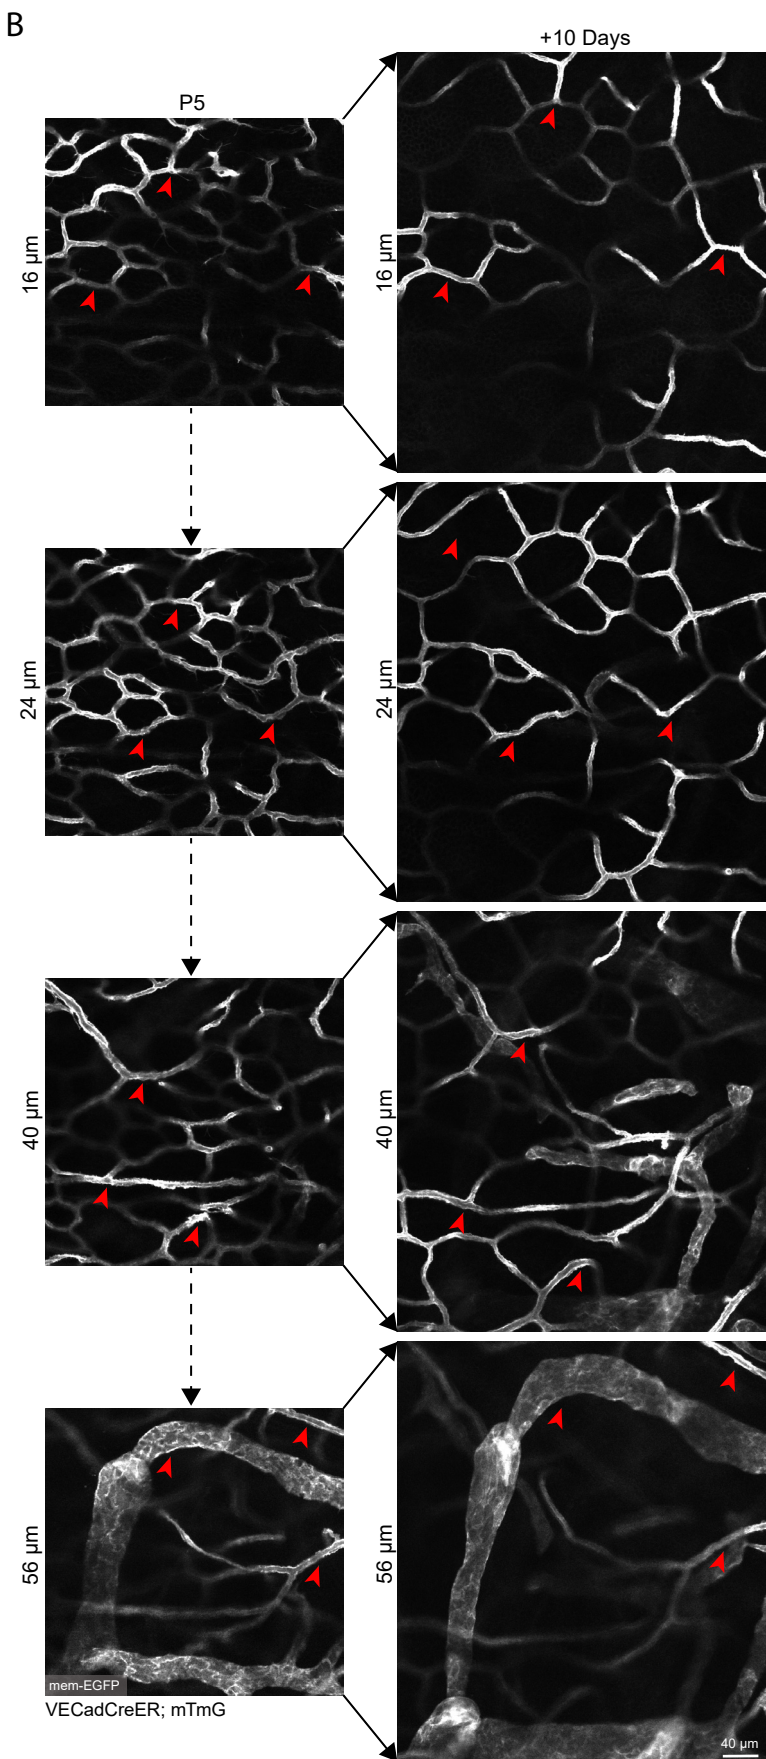

Supplement: NIHMS1893073-supplement-5.pdf [file NIHMS1893073-supplement-5.pdf]

Adult (2-4 mo)

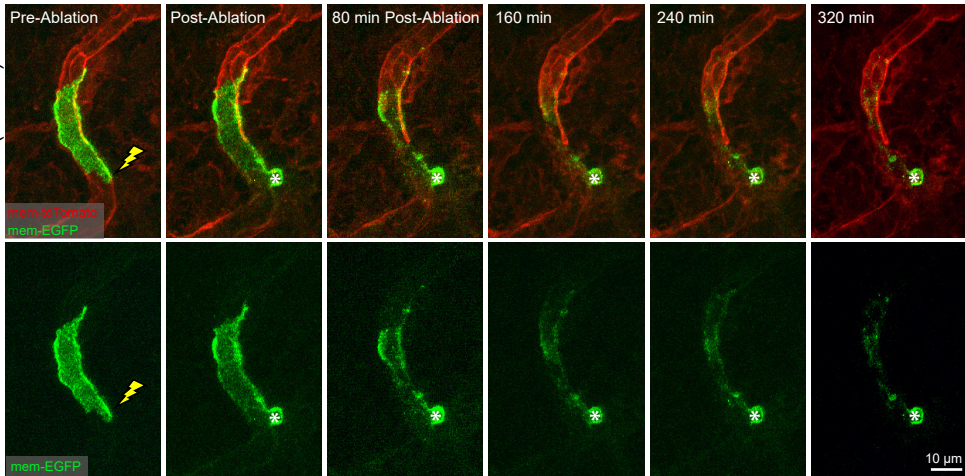

VECadCreER; mTmG

Supplement: NIHMS1893073-supplement-6.pdf [file NIHMS1893073-supplement-6.pdf]

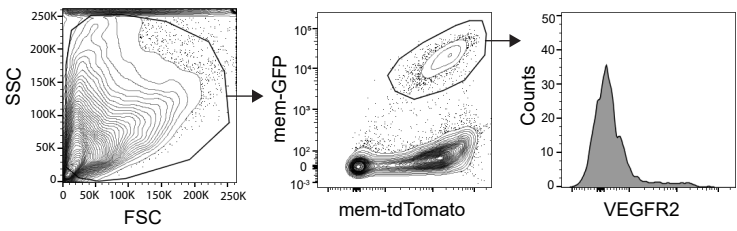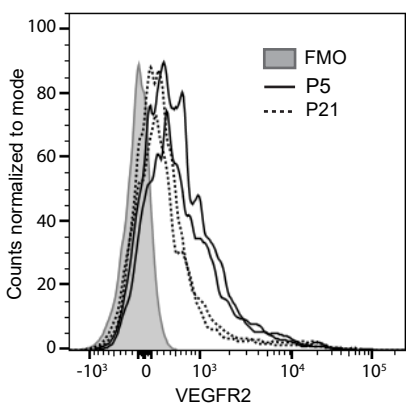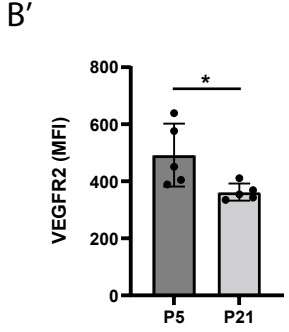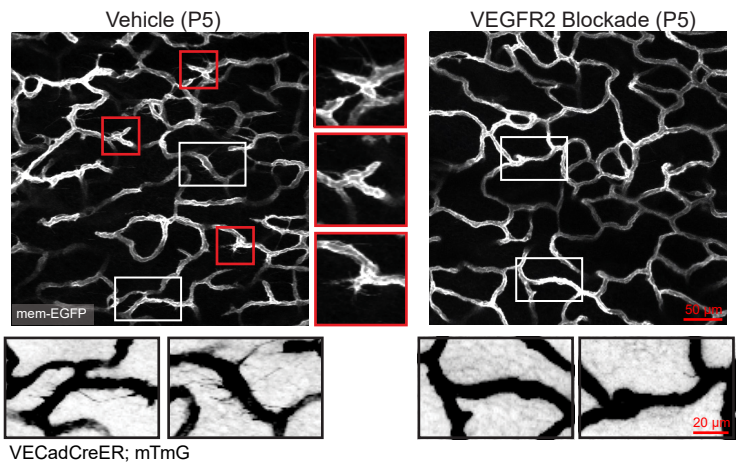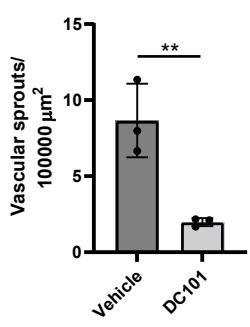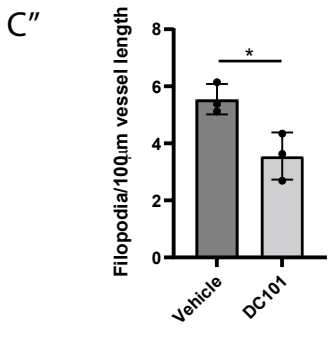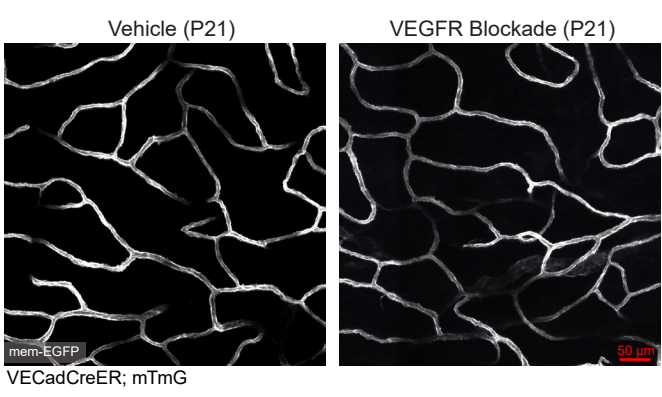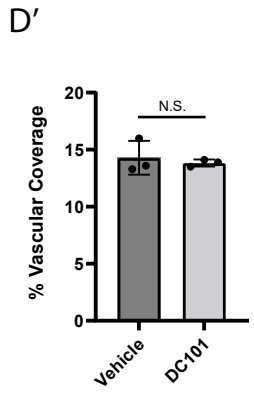

Supplement: NIHMS1893073-supplement-7.pdf [file NIHMS1893073-supplement-7.pdf]
